# Supplementary material for: In Vitro Characterization and In Vivo Efficacy Assessment in Galleria mellonella Larvae of Newly Isolated Bacteriophages against Escherichia coli K1
Source: MDPI journal article supplement (doi:10.3390/v13102005), 2021-10-06
Supplement: s1 [file s1]

**Table S1.** General characteristics of the *Escherichia coli* strains used in this study.

| Pathotype | Origin | Reference | Serogroups and virulence factors                       |
|-----------|--------|-----------|--------------------------------------------------------|
| ExPEC     | Avian  | 30        | O18+, <i>neuC</i> +, <i>ibea</i> +                     |
|           | Avian  | 45        | O18+, <i>neuC</i> +, <i>ibea</i> +                     |
|           | Avian  | 79        | O18+, <i>neuC</i> +, <i>ibea</i> +                     |
|           | Avian  | 134       | O18+, <i>neuC</i> +, <i>ibea</i> +                     |
|           | Avian  | 161       | O18+, <i>neuC</i> +, <i>ibea</i> +                     |
|           | Avian  | 486       | O18+, <i>neuC</i> +, <i>ibea</i> +                     |
|           | Avian  | 591       | O18-, <i>neuC</i> +, <i>ibea</i> +                     |
|           | Avian  | 592       | O18-, <i>neuC</i> +, <i>ibea</i> +                     |
|           | Avian  | 1073      | O18+, <i>neuC</i> +, <i>ibea</i> +                     |
| UPEC      | Avian  | 1343      | O18+, <i>neuC</i> +, <i>ibea</i> +                     |
|           | Human  | 15        | <i>neuC</i> -                                          |
|           | Human  | 142.1     | <i>neuC</i> -                                          |
|           | Human  | 143.1     | <i>neuC</i> +                                          |
|           | Human  | 144.1     | <i>neuC</i> -                                          |
|           | Human  | 144.2     | <i>neuC</i> -                                          |
|           | Human  | 151.1     | <i>neuC</i> -, <i>kfiB</i> (K5)                        |
|           | Human  | 154.2     | <i>neuC</i> -                                          |
| EHEC      | Human  | J96       | <i>neuC</i> -                                          |
|           | Human  | ATCC35150 | O157+, H7+, <i>eae</i> +, <i>stx1</i> +, <i>stx2</i> + |
| EPEC      | Bovine | 40-498-8  | O26+, <i>eae</i> +, <i>stx1</i> +, <i>stx2</i> -       |
|           | Human  | E2348/69  | O127+, <i>eae</i> +                                    |
| Other     | Human  | ATCC25922 |                                                        |

**Table S2.** *Escherichia coli* serogroup collection and characteristics.

| Serogroup | <i>neuC</i> (K1) | <i>KfiB</i> (K5) |
|-----------|------------------|------------------|
| O1        | +                | -                |
| O2        | +                | -                |
| O3        | -                |                  |
| O4        | -                |                  |
| O5        | -                |                  |
| O6        | -                |                  |
| O7        | +                | -                |
| O8        | -                |                  |
| O9        | -                |                  |
| O10       | -                | +                |
| O11       | -                |                  |
| O12       | -                | +                |
| O13       | -                |                  |
| O14       | -                |                  |
| O15       | -                |                  |
| O16       | -                |                  |
| O17       | -                |                  |
| O18       | -                |                  |
| O19       | -                |                  |
| O20       | -                |                  |
| O21       | -                |                  |
| O22       | -                |                  |
| O23       | -                |                  |
| O24       | -                |                  |
| O25       | -                |                  |
| O26       | -                |                  |
| O27       | -                |                  |

---

|      |   |   |
|------|---|---|
| O28  | - |   |
| O29  | - |   |
| O32  | - |   |
| O33  | - |   |
| O35  | - |   |
| O36  | - |   |
| O37  | - |   |
| O38  | - |   |
| O39  | - |   |
| O40  | - |   |
| O41  | - |   |
| O42  | - |   |
| O43  | - |   |
| O44  | - |   |
| O45  | + | - |
| O46  | - |   |
| O48  | - |   |
| O49  | - |   |
| O50  | - |   |
| O51  | - |   |
| O52  | - |   |
| O53  | - |   |
| O54  | - |   |
| O55  | - |   |
| O56  | - |   |
| O57  | - |   |
| O58  | - |   |
| O59  | - |   |
| O60  | - |   |
| O61  | - |   |
| O62  | - |   |
| O63  | - |   |
| O64  | - |   |
| O65  | - |   |
| O66  | - |   |
| O68  | - |   |
| O69  | - |   |
| O70  | - |   |
| O71  | - |   |
| O73  | - |   |
| O74  | - |   |
| O75  | - |   |
| O76  | - |   |
| O77  | - |   |
| O78  | - |   |
| O79  | - |   |
| O80  | - |   |
| O81  | - |   |
| O82  | - |   |
| O83  | - |   |
| O84  | - |   |
| O85  | - |   |
| O86  | - |   |
| O88  | - |   |
| O89  | - |   |
| O90  | - |   |
| O91  | - |   |
| O92  | - |   |
| O93  | - |   |
| O95  | - |   |
| O96  | - |   |
| O97  | - |   |
| O98  | - |   |
| O99  | - |   |
| O100 | - |   |

---

---

|        |   |
|--------|---|
| O101   | - |
| O102   | - |
| O103   | - |
| O104   | - |
| O105   | - |
| O106   | - |
| O107   | - |
| O108   | - |
| O109   | - |
| O110   | - |
| O111   | - |
| O112AB | - |
| O112AC | - |
| O113   | - |
| O114   | - |
| O115   | - |
| O116   | - |
| O117   | - |
| O118   | - |
| O119   | - |
| O120   | - |
| O121   | - |
| O123   | - |
| O124   | - |
| O125   | - |
| O126   | - |
| O127   | - |
| O128   | - |
| O129   | - |
| O130   | - |
| O131   | - |
| O132   | - |
| O134   | - |
| O135   | - |
| O136   | - |
| O137   | - |
| O138   | - |
| O139   | - |
| O140   | - |
| O141   | - |
| O142   | - |
| O143   | - |
| O144   | - |
| O145   | - |
| O146   | - |
| O147   | - |
| O148   | - |
| O149   | - |
| O150   | - |
| O151   | - |
| O152   | - |
| O153   | - |
| O154   | - |
| O155   | - |
| O156   | - |
| O157   | - |
| O158   | - |
| O159   | - |
| O160   | - |
| O161   | - |
| O162   | - |
| O163   | - |
| O164   | - |
| O165   | - |
| O166   | + |

---

|      |   |
|------|---|
| O167 | - |
| O168 | - |
| O169 | - |
| O170 | - |
| O171 | - |
| O172 | - |
| O173 | - |
| O174 | - |
| O175 | - |
| O176 | - |
| O177 | - |
| O178 | - |
| O179 | - |
| O180 | - |
| O181 | - |
| O182 | - |
| O183 | - |
| O184 | - |
| O185 | - |
| O186 | - |
| O187 | - |
| O188 | - |

**Table S3.** Primers used for PCR amplifications.

| Gene             | Primers | Primer sequence (5'-3')       | Size of PCR product (bp) | Annealing temp (°C) | Reference                      |
|------------------|---------|-------------------------------|--------------------------|---------------------|--------------------------------|
| <i>neuC</i>      | neu1    | AGGTGAAAAGCCTGGTAGTG<br>TG    | 676                      | 61                  | Moulin <i>et al.</i> ,<br>2006 |
|                  | neu2    | GGTGGTACATCCCGGGATGT<br>C     |                          |                     |                                |
| <i>kfib</i>      | kfib_F  | AATTGTTTAAAAATCTGTTCT         | 501                      | 52.5                | Bekal <i>et al.</i> , 2003     |
|                  | kfib_R  | TGAGACTGAAATTACATTTA<br>A     |                          |                     |                                |
| <i>wzx</i> (O18) | OgC1-F  | GTTCCGGTGGTTGGATTACAGT<br>TAG | 551                      | 58                  | Iguchi <i>et al.</i> ,<br>2015 |
|                  | OgC1-R  | CTACTATCATCCTCACTGACC<br>ACG  |                          |                     |                                |
| <i>ibeA</i>      | ibeA_F  | TGAACGTTTCGGTTGTTTTG          | 814                      | 55                  | Germon <i>et al.</i> , 2005    |
|                  | ibeA_R  | TGTTCAAATCCTGGCTGGAA          |                          |                     |                                |
